# Supplementary material for: Selective oxidative upgrade of waste polystyrene plastics by nitric acid to produce benzoic acid
Source: Royal Society of Chemistry journal article supplement (doi:10.1039/d3gc00865g), 2023-01-01
Supplement: d3gc00865g1.pdf [file d3gc00865g1.pdf]

## **Selective oxidative upgrade of waste polystyrene plastics by nitric acid to produce benzoic acid**

Xi Luo<sup>a, b</sup>, Jiahui Zhan<sup>a, b</sup>, Qingqing Mei<sup>c, \*</sup>, Shicheng Zhang<sup>a, b, \*</sup>

<sup>a</sup> Shanghai Technical Service Platform for Pollution Control and Resource Utilization of Organic Wastes, Shanghai Key Laboratory of Atmospheric Particle Pollution and Prevention (LAP3), Department of Environmental Science and Engineering, Fudan University, Shanghai 200438, China.

<sup>b</sup> Shanghai Institute of Pollution Control and Ecological Security, Shanghai, 200092, China.

<sup>c</sup> Institute of Environment Science and Technology, College of Environmental and Resource Sciences, Zhejiang University, Hangzhou 310030, China

\*Corresponding author: [zhangsc@fudan.edu.cn](mailto:zhangsc@fudan.edu.cn), [meiqq@zju.edu.cn](mailto:meiqq@zju.edu.cn)

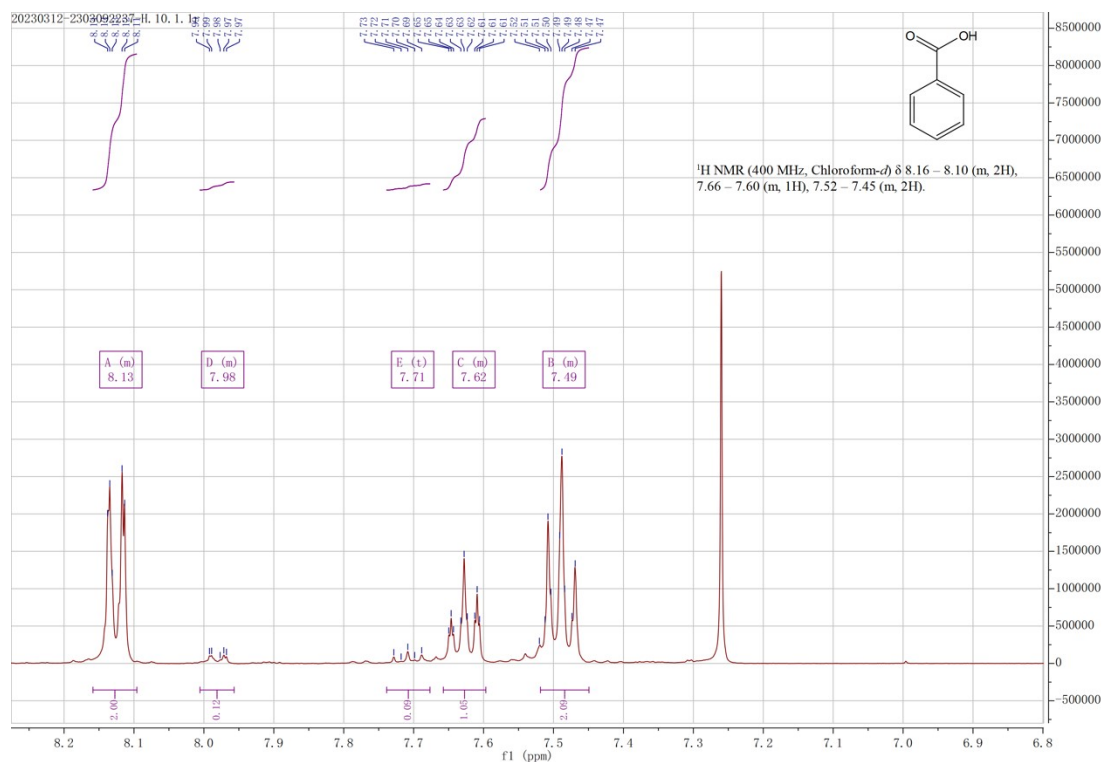

**Fig. S1** <sup>1</sup>H-NMR spectra of the product (1g PS, 10ml 20% HNO<sub>3</sub>, 180 °C, 3 h).

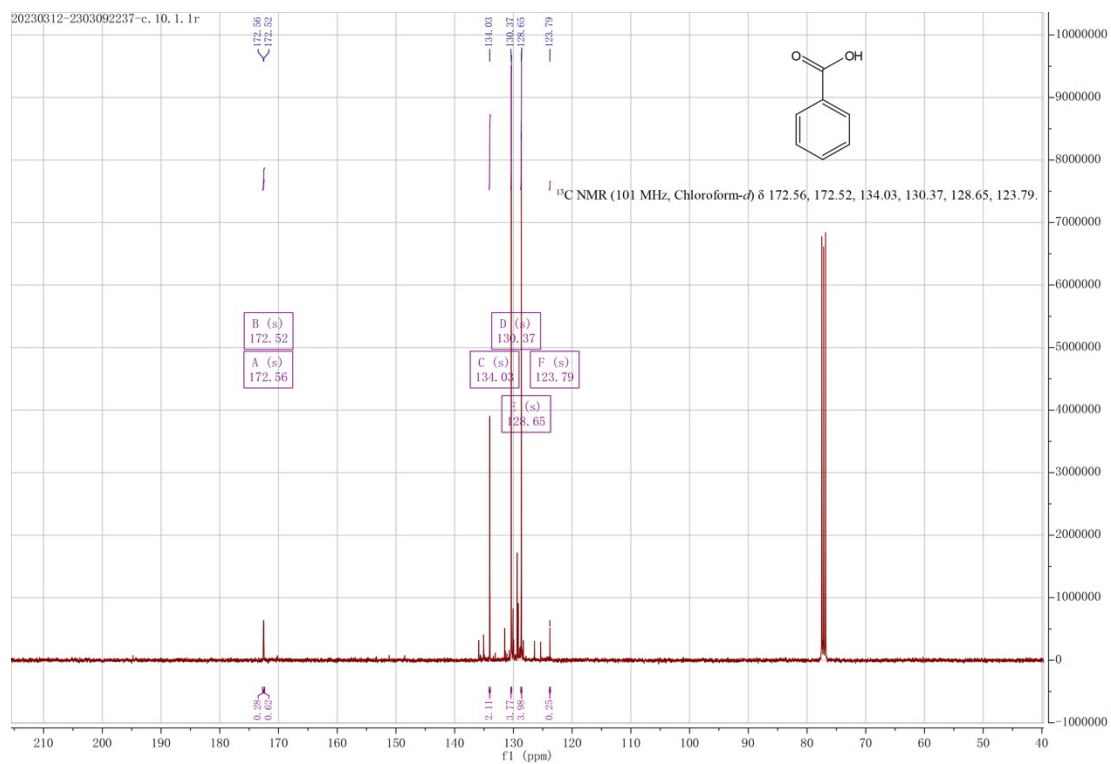

**Fig. S2**  $^{13}\text{C}$ -NMR spectra of the product (1g PS, 10ml 20%  $\text{HNO}_3$ , 180  $^\circ\text{C}$ , 3 h).

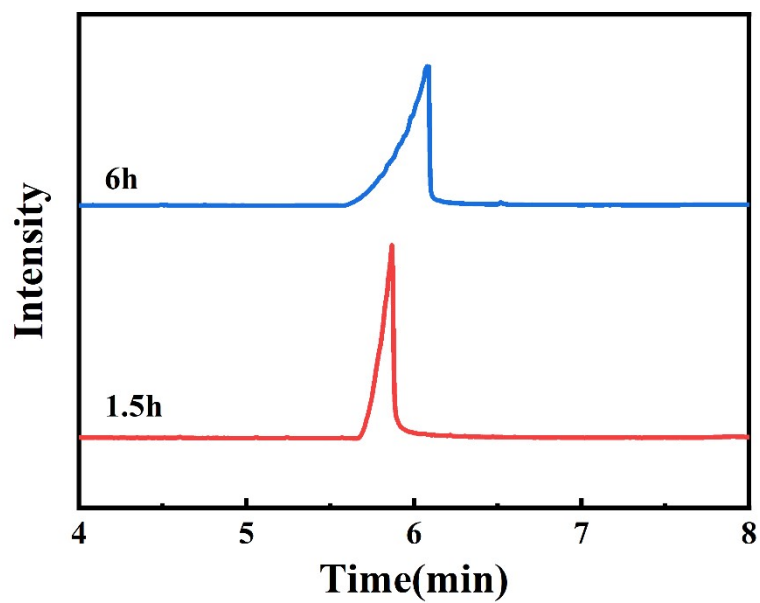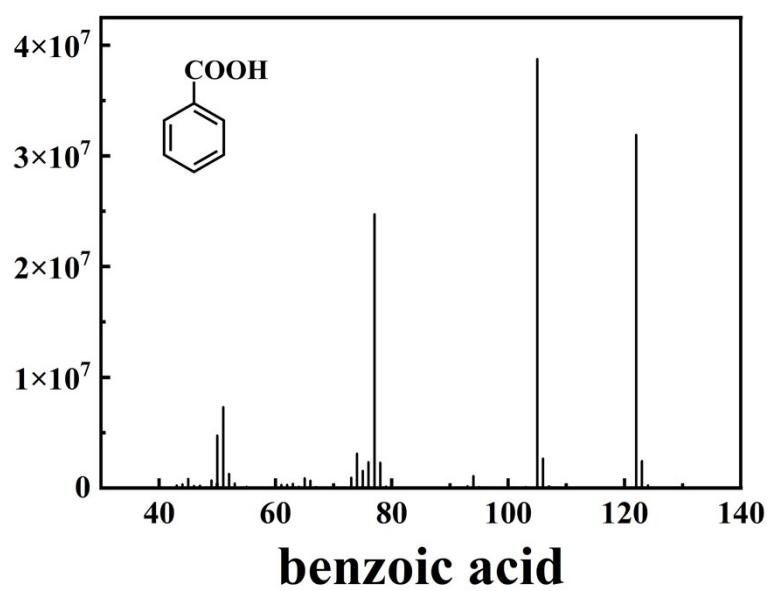

**Fig. S3** GC-MS spectra of pure benzoic acid oxidation process (1g benzoic acid, 10ml 20% HNO<sub>3</sub>, 180 °C).

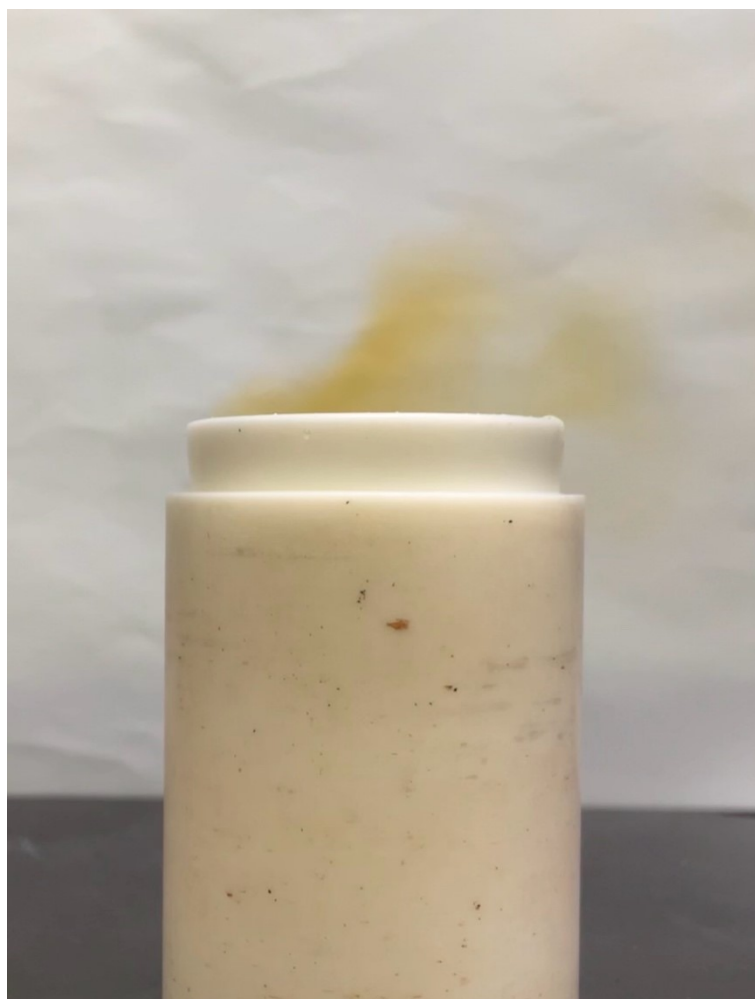

**Fig. S4** Reddish brown gas generated after the reaction.

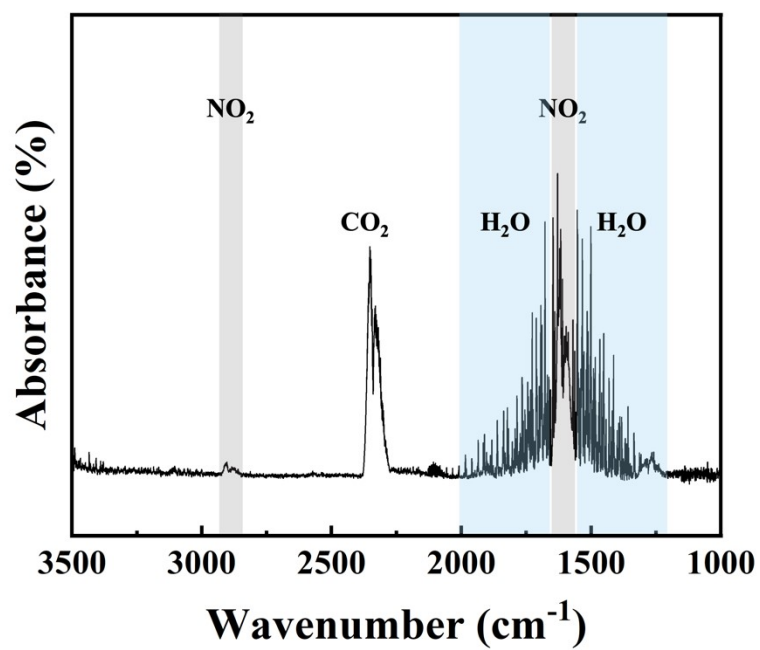

**Fig. S5** FTIR spectra of the gas collected after the reaction (CO<sub>2</sub> and H<sub>2</sub>O are impurity peaks generated during the detection process).

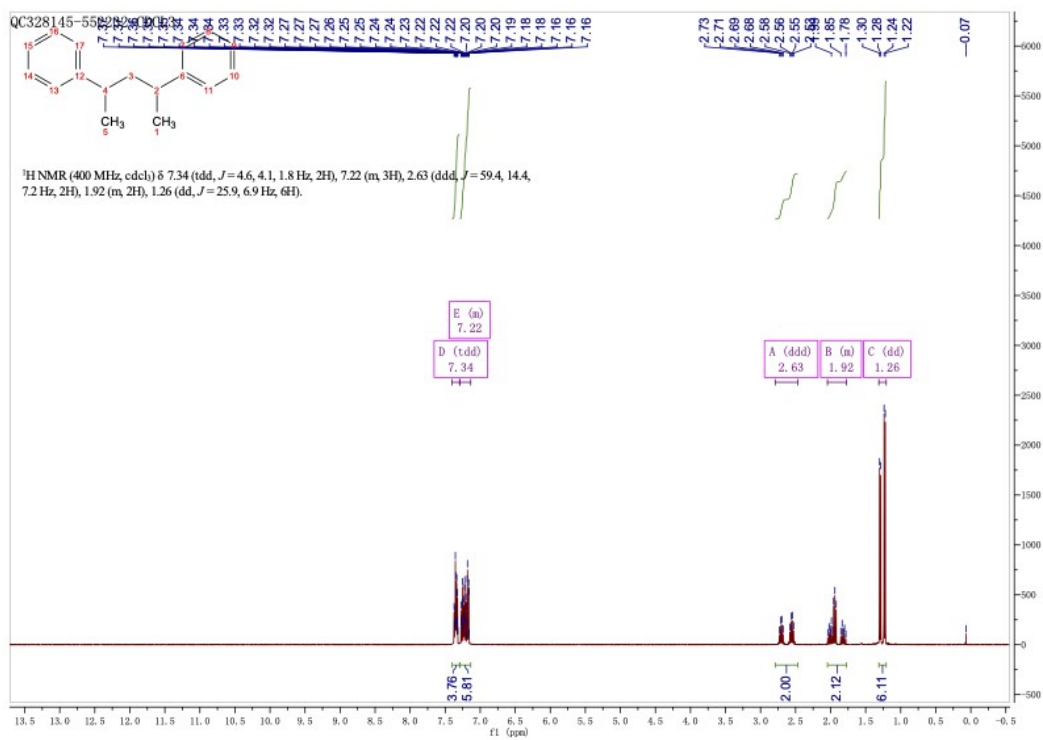

Fig. S6 <sup>1</sup>H-NMR spectra of 2,4-Diphenylpentane.

MS Report from Instrument: LCMS

File ..\02 2023-03-03 09-21-10\OnlineEdited--018.D Tgt Mass (EZ):  
 Injection Date : 3 Mar 23 10:50 am +0800 Seq. Line : 18  
 Sample Name : 20230303-QC396232-661927 Location : 17  
 Acq. Operator : SYSTEM Inj : 1  
 Spec. Reported : MS Integration Inj Volume : 1 ul  
 Acq. Method : D:\Chem32\1\Data\MAFANGYA\02 2023-03-03 09-21-10\20171123--FA02-M.M  
 Analysis Method : D:\Chem32\1\Data\MAFANGYA\02 2023-03-03 09-21-10\20171123--FA02-M.M  
 Sample Info :  
 Method Info :

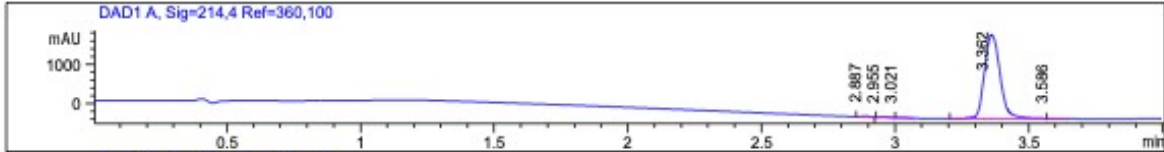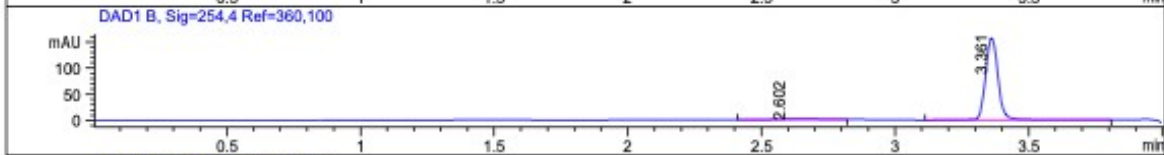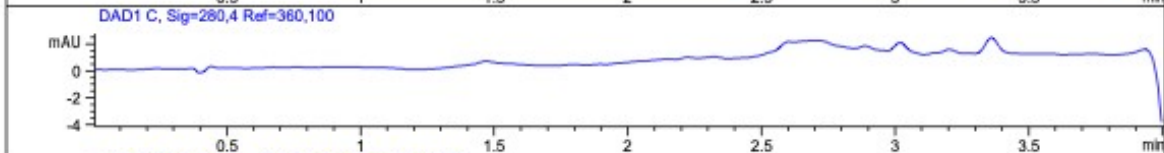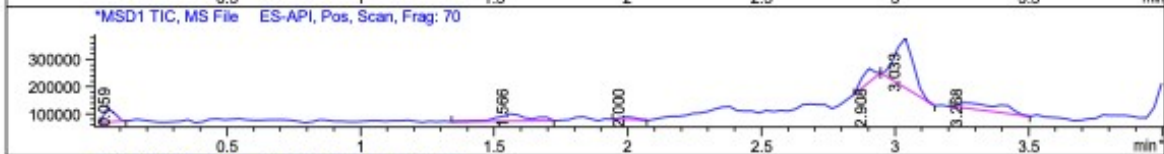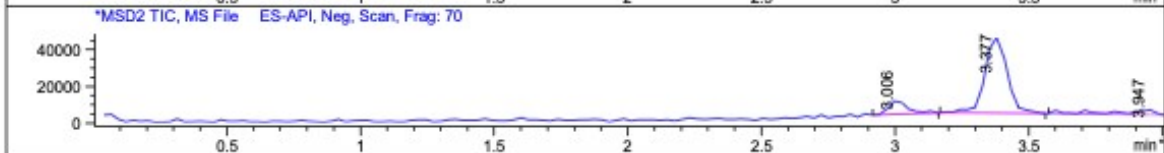

Integration Results for DAD1 A, Sig=214,4 Ref=360,100

| RetTim | Width | Area    | Height  | Area% | MS (+) | MS (-) |
|--------|-------|---------|---------|-------|--------|--------|
| 2.89   | 0.04  | 32.20   | 14.23   | 0.37  | 247    | 299    |
| 2.96   | 0.04  | 22.35   | 10.05   | 0.25  | 247    | 113    |
| 3.02   | 0.04  | 20.14   | 8.11    | 0.23  | 301    | 113    |
| 3.36   | 0.07  | 8706.95 | 2154.93 | 99.06 | 319    | 339    |
| 3.59   | 0.05  | 7.65    | 2.61    | 0.09  | 319    | 113    |

Integration Results for DAD1 B, Sig=254,4 Ref=360,100

| RetTim | Width | Area   | Height | Area% | MS (+) | MS (-) |
|--------|-------|--------|--------|-------|--------|--------|
| 2.60   | 0.13  | 15.52  | 1.50   | 2.92  | 117    | ND     |
| 3.36   | 0.05  | 516.65 | 157.71 | 97.08 | 319    | 113    |

Integration Results for DAD1 C, Sig=280,4 Ref=360,100

| RetTim | Width | Area | Height | Area% | MS (+) | MS (-) |
|--------|-------|------|--------|-------|--------|--------|
|        |       |      |        |       |        |        |

Fig. S7 LC-MS report of 2,4-Diphenylpentane.



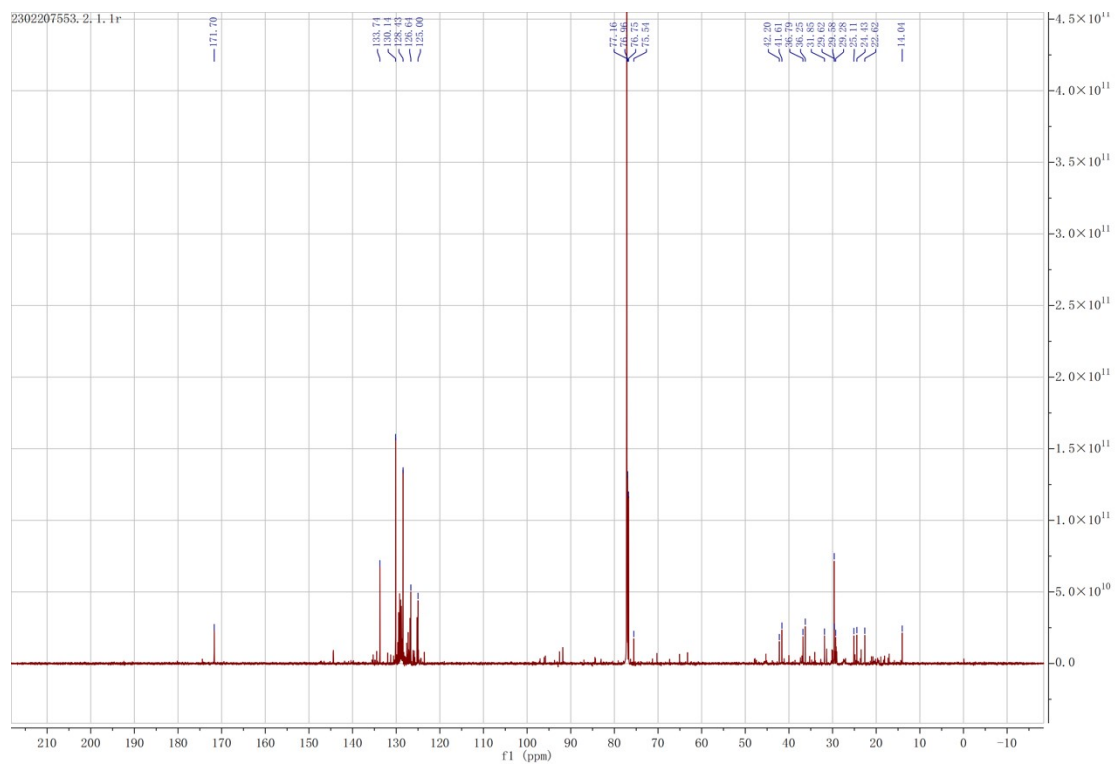

**Fig. S8** <sup>13</sup>C-NMR spectra of oxidative upgrade of 2,4-Diphenylpentane (0.1g 2,4-Diphenylpentane, 3ml 20% HNO<sub>3</sub>, 180 °C, 10 min).

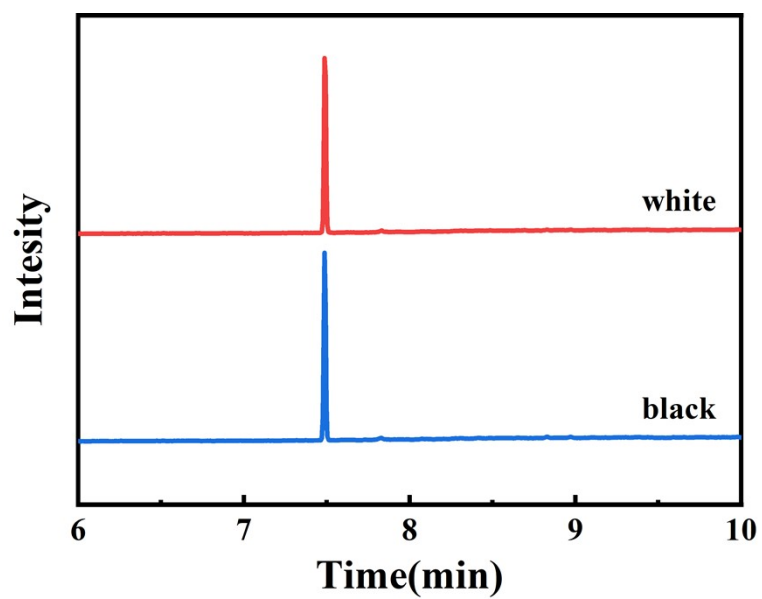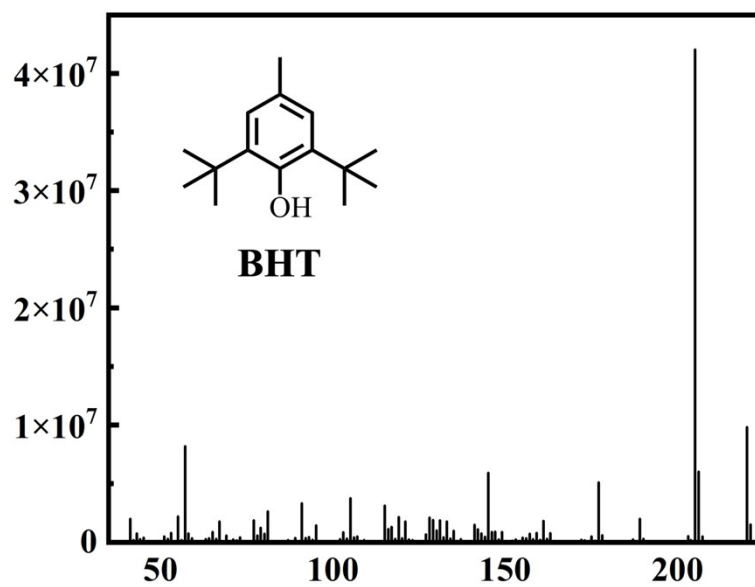

**Fig. S9** GC/MS spectra of the solid residue generated after oxidative upgrade of the cup lids.
